# Supplementary material for: Two-dimensional polarized MoTe2/GeS heterojunction with an intrinsic electric field for photocatalytic water-splitting
Source: Royal Society of Chemistry journal article supplement (doi:10.1039/d1ra05840a), 2021-01-01
Supplement: d1ra05840a1.pdf [file d1ra05840a1.pdf]

## Supporting Information

### Two dimensional polarized MoTe<sub>2</sub>/GeS heterojunction with intrinsic electric field for photocatalytic water-splitting

Di Gu<sup>a,b</sup>, Xiaoma Tao<sup>b</sup>, Hongmei Chen<sup>b</sup>, Yifang Ouyang<sup>b,\*</sup>, Weiling Zhu<sup>a,\*</sup>, Yong Du<sup>c</sup>

- a. Department of Physics, School of Science, Guangdong University of Petrochemical Technology, Maoming, Guangdong 525000, People's Republic of China.
- b. School of Physical Science and Technology, Guangxi University, Nanning 530004, People's Republic of China.
- c. State Key Laboratory of Powder Metallurgy, Central South University, Changsha, 410083, China.
- Corresponding Emails: [ouyangyf@gxu.edu.cn](mailto:ouyangyf@gxu.edu.cn) and [zhuweiling@gdupt.edu.cn](mailto:zhuweiling@gdupt.edu.cn).

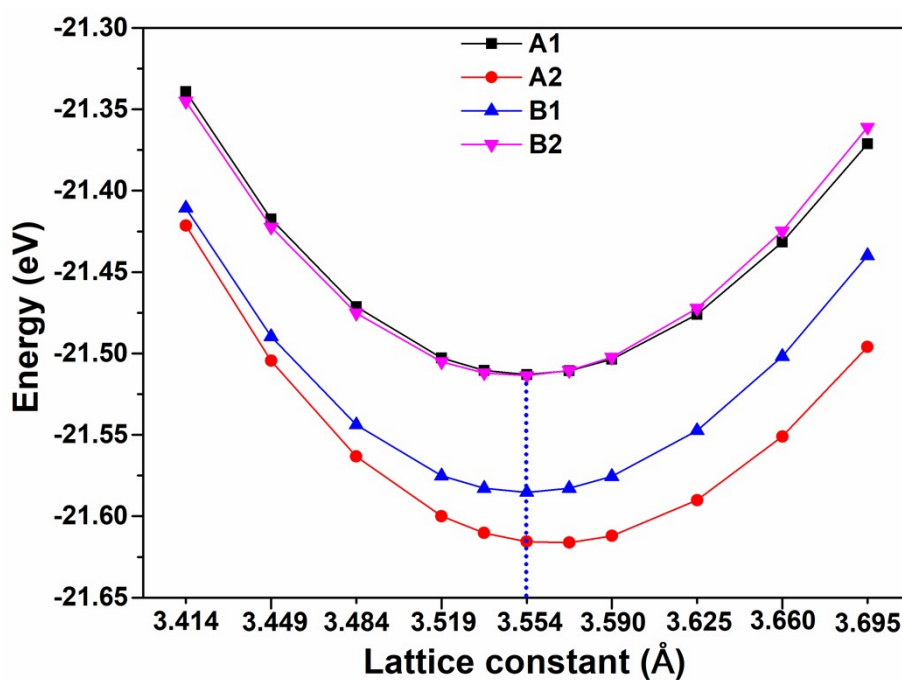

Figure S1. The energy as a function of lattice constant of MoTe<sub>2</sub>/GeS heterojunction.

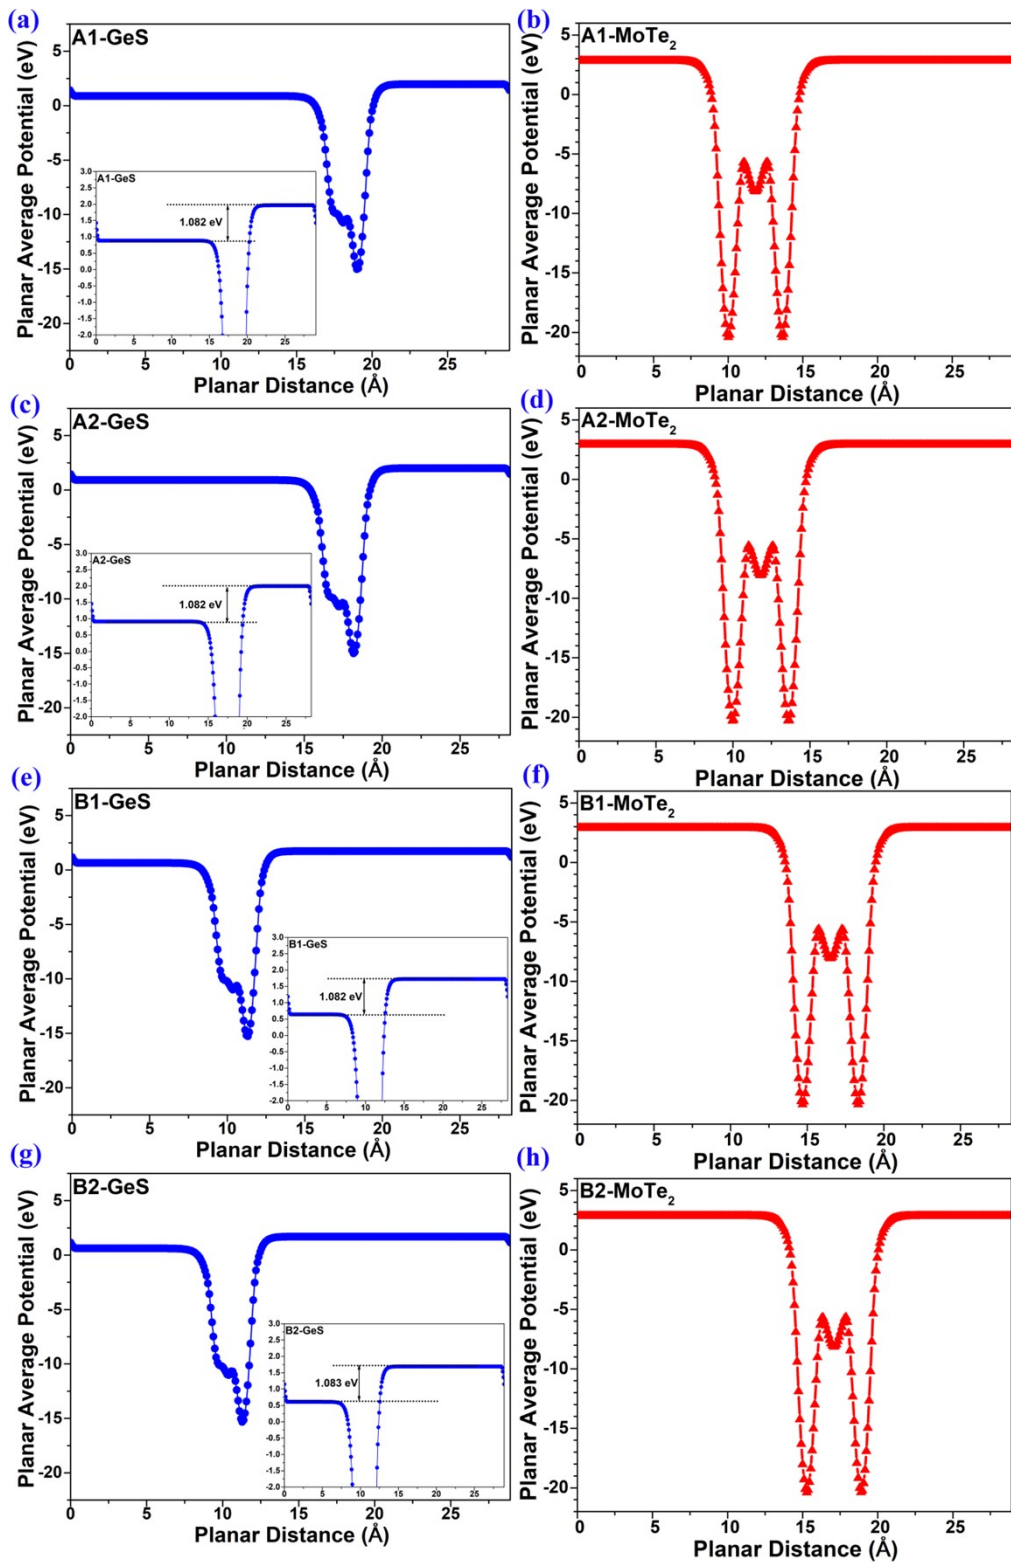

Figure S2. The planar average potential of isolated monolayer GeS and isolated monolayer MoTe<sub>2</sub> for (a,b) A1-, (c,d) A2-, (e,f) B1- and (g,h) B2- stacking structures of MoTe<sub>2</sub>/GeS heterojunction.
